# Supplementary material for: Symptom Patterns in Premature Ovarian Insufficiency Differ Across Age of Diagnosis and Aetiology: Implications for Neural Mechanisms and Brain Health
Source: Research Square preprint supplement (doi:10.21203/rs.3.rs-8280682/v1), 2025-12-08
Supplement: Supplementary file 1 [file 9696cca30cff5c1bb78ee1ba.docx]

**Supplementary Information**

**Results**

**EFA**

Assumption checks confirmed factorability: the Kaiser-Meyer-Olkin (KMO) measure ranged from 0.758-0.819, and Bartlett’s test of sphericity was significant (χ²(66)= 393, *p*<0.001). Three factors were retained, explaining 39.30% of the total variance (Cognitive symptoms: 14.70%, Physical symptoms: 14.20%, Emotional distress: 10.40%). Interfactor correlations were moderate (0.465-0.509), justifying oblique rotation. No items cross-loaded on multiple factors; each symptom was assigned to the factor on which it loaded most strongly.

**Interactions models: SEM**

Cognitive symptoms * age group: χ²(8)=14.87, p=0.062, CFI=0.97, TLI=0.95, RMSEA=0.077, SRMR=0.040

Physical symptoms * age group: χ²(8)=17.19, p=0.028, CFI=0.97, TLI=0.94, RMSEA=0.089, SRMR=0.048

Emotional distress * age group: χ²(8)=25.96, p=0.001, CFI=0.93, TLI=0.87, RMSEA=0.125, SRMR=0.058)

**Sensitivity analysis**

Severity scale 1 (least severe) to 10 (most severe)

Participants with medical/surgical POI had 2.10 times higher odds of experiencing more severe brain fog (p=0.017, 95% CI: 1.20, 6.22) and 2.29 times higher odds of experiencing more severe anxiety (p=0.038, 95% CI: 1.05, 5.03) compared to those with idiopathic POI. Smokers had 1.17 times higher odds of more severe brain fog (p=0.039, 95% CI: 1.06, 4.51), 2.94 times higher odds of more severe poor memory (p=0.006, 95% CI: 1.38, 6.38), and 2.37 times higher odds of more severe anxiety (p=0.018, 95% CI: 1.17, 4.85) than non-smokers. HRT users were at higher odds (OR=2.91) of more severe poor memory (p=0.049, 95% CI: 1.01, 8.62) and severe palpitations (OR=16.03, p=0.002, 95% CI: 2.86, 107.70), although the 95% CI was wide reflecting the small number (52%) of participants reporting palpitations in this subgroup. Older age was associated with 0.94 times lower odds of severe palpitations (p=0.021, 95% CI: 0.89, 0.99), whereas excessive alcohol use was associated with 4.72 times higher odds of severe palpitations (p=0.036, 95% CI: 1.08, 20.54). There were no significant differences in severity for low mood, fatigue, or hot flashes across POI type, HRT status, age, smoking, alcohol use, or ethnicity.
